# Supplementary material for: Naphthoquinone as a New Chemical Scaffold for Leishmanicidal Inhibitors of Leishmania GSK-3
Source: MDPI journal article supplement (doi:10.3390/biomedicines10051136), 2022-05-14
Supplement: s1 [file s1]

## Supplementary Material

### Naphthoquinone as a new chemical scaffold for leishmanicidal inhibitors of *Leishmania* GSK-3

Victor Sebastián-Pérez,<sup>1,&</sup> Paula Martínez de Iturrate,<sup>1,&</sup> Montserrat Nácher-Vázquez,<sup>1</sup>  
Luis Nóvoa,<sup>1</sup> Concepción Pérez,<sup>2</sup> Nuria E. Campillo,<sup>2</sup> Carmen Gil<sup>1,\*</sup> and Luis Rivas<sup>1,\*</sup>

<sup>1</sup>Centro de Investigaciones Biológicas (CIB-CSIC), Madrid, Spain

<sup>2</sup>Instituto de Química Médica (IQM-CSIC), Madrid, Spain

<sup>&</sup>Both authors contribute equally to this work

#### Index:

**Page S2:** Sequence alignment of the GSK-3 structures of *Leishmania major* (Q4QE15) and *Homo sapiens* (P49841).

**Page S3:** Chemical structures of the 24 compounds from the MBC library selected by virtual screening and their biological evaluation.



**Table S1.** Enzymatic and biological characterization of the 24 compounds from the MBC library selected by virtual screening.

| Compound | Chemical formula                                                                    | LdGSK-3s<br>IC <sub>50</sub> (μM) | <i>L. infantum</i><br>promastigotes<br>IC <sub>50</sub> (μM) | <i>L. pifanoi</i><br>axenic<br>amastigotes<br>IC <sub>50</sub> (μM) | Murine<br>peritoneal<br>macrophages<br>IC <sub>50</sub> (μM) | Selectivity<br>index (SI) |
|----------|-------------------------------------------------------------------------------------|-----------------------------------|--------------------------------------------------------------|---------------------------------------------------------------------|--------------------------------------------------------------|---------------------------|
| MBC-10   | 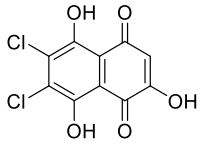   | ~10*                              | 10.5 ± 1.2                                                   | 11.2 ± 2.5                                                          | ND                                                           | ND                        |
| MBC-49   |    | >10                               | >50                                                          | >50                                                                 | -                                                            | -                         |
| MBC-61   |   | >10                               | >50                                                          | >50                                                                 | -                                                            | -                         |
| MBC-85   |  | >10                               | >50                                                          | >50                                                                 | -                                                            | -                         |

\* MBC-10 at 10 μM causes 45.7 ± 7.6 % inhibition of LdGSK-3s activity.

| Compound | Chemical formula                                                                    | LdGSK-3s<br>IC <sub>50</sub> (μM) | <i>L. infantum</i><br>promastigotes<br>IC <sub>50</sub> (μM) | <i>L. pifanoi</i><br>axenic<br>amastigotes<br>IC <sub>50</sub> (μM) | Murine<br>peritoneal<br>macrophages<br>IC <sub>50</sub> (μM) | Selectivity<br>index (SI) |
|----------|-------------------------------------------------------------------------------------|-----------------------------------|--------------------------------------------------------------|---------------------------------------------------------------------|--------------------------------------------------------------|---------------------------|
| MBC-11   | 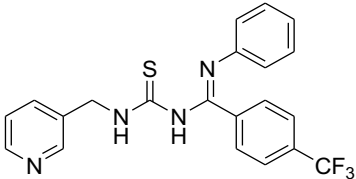   | >10                               | >25                                                          | >25                                                                 | -                                                            | -                         |
| MBC-188  |    | >10                               | >50                                                          | >50                                                                 | -                                                            | -                         |
| MBC-189  |    | >10                               | >50                                                          | >50                                                                 | -                                                            | -                         |
| MBC-190  |   | >10                               | >50                                                          | >50                                                                 | -                                                            | -                         |
| MBC-191  |  | >10                               | >50                                                          | >50                                                                 | -                                                            | -                         |

| Compound | Chemical formula                                                                    | LdGSK-3s<br>IC <sub>50</sub> (μM) | <i>L. infantum</i><br>promastigotes<br>IC <sub>50</sub> (μM) | <i>L. pifanoi</i><br>axenic<br>amastigotes<br>IC <sub>50</sub> (μM) | Murine<br>peritoneal<br>macrophages<br>IC <sub>50</sub> (μM) | Selectivity<br>index (SI) |
|----------|-------------------------------------------------------------------------------------|-----------------------------------|--------------------------------------------------------------|---------------------------------------------------------------------|--------------------------------------------------------------|---------------------------|
| MBC-192  | 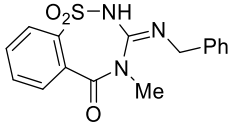   | >10                               | >50                                                          | >50                                                                 | -                                                            | -                         |
| MBC-193  |    | >10                               | >50                                                          | >50                                                                 | -                                                            | -                         |
| MBC-194  |    | >10                               | >50                                                          | >50                                                                 | -                                                            | -                         |
| MBC-195  |   | >10                               | >50                                                          | >50                                                                 | -                                                            | -                         |
| MBC-196  |  | >10                               | >25                                                          | >50                                                                 | -                                                            | -                         |

| Compound | Chemical formula                                                                    | LdGSK-3s<br>IC <sub>50</sub> (μM) | <i>L. infantum</i><br>promastigotes<br>IC <sub>50</sub> (μM) | <i>L. pifanoi</i><br>axenic<br>amastigotes<br>IC <sub>50</sub> (μM) | Murine<br>peritoneal<br>macrophages<br>IC <sub>50</sub> (μM) | Selectivity<br>index (SI) |
|----------|-------------------------------------------------------------------------------------|-----------------------------------|--------------------------------------------------------------|---------------------------------------------------------------------|--------------------------------------------------------------|---------------------------|
| MBC-197  | 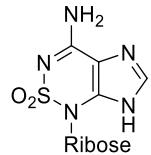   | >10                               | >50                                                          | >50                                                                 | -                                                            | -                         |
| MBC-198  |    | >10                               | >50                                                          | >50                                                                 | -                                                            | -                         |
| MBC-199  |   | >10                               | >50                                                          | >50                                                                 | -                                                            | -                         |
| MBC-200  |  | >10                               | >50                                                          | 20.8 ± 0.0                                                          | >25                                                          | >1.2                      |
| MBC-201  |  | >10                               | >50                                                          | >50                                                                 | -                                                            | -                         |

| Compound | Chemical formula                                                                    | LdGSK-3s<br>IC <sub>50</sub> (μM) | <i>L. infantum</i><br>promastigotes<br>IC <sub>50</sub> (μM) | <i>L. pifanoi</i><br>axenic<br>amastigotes<br>IC <sub>50</sub> (μM) | Murine<br>peritoneal<br>macrophages<br>IC <sub>50</sub> (μM) | Selectivity<br>index (SI) |
|----------|-------------------------------------------------------------------------------------|-----------------------------------|--------------------------------------------------------------|---------------------------------------------------------------------|--------------------------------------------------------------|---------------------------|
| MBC-202  | 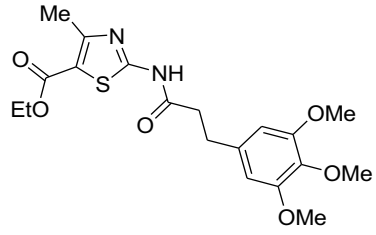   | >10                               | >50                                                          | >50                                                                 | -                                                            | -                         |
| MBC-203  |    | >10                               | >50                                                          | >50                                                                 | -                                                            | -                         |
| MBC-204  |    | >10                               | >50                                                          | >50                                                                 | -                                                            | -                         |
| MBC-205  |   | >10                               | >50                                                          | >50                                                                 | -                                                            | -                         |
| MBC-206  |  | >10                               | >50                                                          | >50                                                                 | -                                                            | -                         |
